# Supplementary material for: Comparative analysis of plant genomes allows the definition of the "Phytolongins": a novel non-SNARE longin domain protein family
Source: PubMed Central journal article supplement (PMC2779197; doi:10.1186/1471-2164-10-510), 2009-11-04
Supplement: 1471-2164-10-510-S3.pdf [file 1471-2164-10-510-S3.pdf]

**Gnetophyta**

*Gnetum gnemon*

GRATE TSG-AHNLG-----VYGNDEKFKI

**Coniferophyta**

*Picea glauca*

GGRAETNM-AHSL-----DKYGYEERKFSV

*Pinus taeda*

GGRAETSM-AHSL-----DKYGYEERKFSV

*Picea sitchensis*

GGRAETSM-AHSL-----DKYGYEERKFSV

**Magnoliids**

*Saruma henry*

GASITSES-PHPLADD--EDDYLLERFGI

**Monocotyledones**

*Phalaenopsis equestris*

QSSINADG-SHPLIDD--DDDD--LFEDRFSI

*Allium cepa*

GSQINVD--PHPLADD--DDED--LFEDRFSI

*Elaeis oleifera*

GLGINDDG-PHPLADD--DDDD--LFEDRFSI

*Ananas comosus*

GSSIGSED-PHPLADE--EDDFLFEDRFSI

*Oryza sativa*

GSSIDEEG-QHPLADDADDDFLLED RFSI

*Zea mays*

GSSIDEEG-QHPLADDAEDDFLFEDRFSI

*Triticum aestivum*

GSSIDEEG-QHPLADDAEDDFLFEDRFSI

*Triticum turgidum*

GSSIDEEG-QHPLADDAEDDFLFEDRFSI

*Hordeum vulgare*

GSSIDEEG-QHPLADDAEDDFLFEDRFSI

*Brachypodium distachyon*

GSSIDEEG-QHPLADDAEDDFLFEDRFSI

*Sorghum bicolor*

GSSIDEEG-QHPLADDAEDDFLFEDRFSI

*Saccharum officinarum*

GSSIDEEG-QHPLADDAEDDFLFEDRFSI

*Agrostis capillaris*

GSSIDEEG-QHPLADDAEDDFLFEDRFSI

*Zingiber officinale*

GOSISGNN-SHPLIDE--EDALFGDRFST

**Eudicotyledones**

*Aquilegia formosa*

GASIGSEG-PHALADE--EEDDLFEDRFSI

*Beta vulgaris*

AGSIKSGD-AHPLAEENSDDDLFEDRFSI

*Vitis vinifera*

GGSIKSDG-PHPLADEDDDDDLFEDRFSI

*Juglans hindsii x Juglans regia*

SARIKDEG-PHPLADEDEDDDLFEDRFSI

*Juglans regia*

GPSIKDVG-PHPLADDD--DDDLFEDRFSI

*Cucumis melo*

GSSIKDEN-PHPLADDE--DDDLFLDRFSI

*Prunus persica*

GSNNKIEG-PHPLADDN--EEDDLFEDRFSI

*Fragaria vesca*

APSIKNEG-PHPLADED--EDDALFEDRFSI

*Malus x domestica x Malus sieversii*

AADIKNAG-PHPLDDDD--EEDDLFEDRFSI

*Malus x domestica*

GPDIKNAG-PHPLADGD--EEDDLFEDRFSI

*Glycine max*

GASIKNDG-AHPLADDE--DDDLFEDRFSI

*Lotus japonicus*

GASIKNAS-DHPLADDD--DDDLFQDRFSI

*Populus trichocarpa*

SASIKNE--AHPLADDD--DDDLFEDRFSV

*Populus trichocarpa*

GASIKNE--AHPLADDE--DDDLFEDRFSI

*Euphorbia esula*

GSCISNE--VHPLADD--EEDDLFEDRFSI

*Manihot esculenta*

GASIKNE--THPLADD--DDDLFEDRFSI

*Brassica napus*

EASIKNDE-PHPLADDD--EDDLFGDRFSI

*Brassica oleracea*

GASIKIDE-PHSLADDD--EDDLFGDRFSI

*Descurainia sophia*

EASIKNDE-RHPLADDD--EDDLFGDRFSI

*Arabidopsis thaliana*

EASIKNDE-RHPLADED--EDDLFGDRFSV

*Brassica rapa*

GASIKNDE-PHPLADDDDEDDDLFGDRFCI

*Raphanus raphanistrum*

EASIKNDE-PHPLADDDDEDDDLFGDRFSI

*Raphanus sativus*

EASIKNDE-PHPLADDDDEDDDLFGDRFSI

*Gossypium raimondii*

GASIRNEG-PHPLADDD--DDDLFEDRFSI

*Gossypium hirsutum*

GASIRNGG-PHPLADDD--DDDLFEDQFSI

*Citrus clementina*

GASIQNEE-SHPLADDD--EDDLFEDRFSI

*Vaccinium corymbosum*

GASIRTDG-QHPLADDD--EDDLFQDRFSI

*Solanum habrochaites*

GSSIKNDGDPHPLADDDDEDDDLFGDRFSI

*Solanum tuberosum*

GSSIKNDGDPHPLADDDDEDDDLFGDRFSI

*Solanum lycopersicum*

GSSIKNDGDPHPLADGDEDDDLFGDRFSI

*Solanum chacoense*

GSSIKNDGDPHPLADDDNEDDDLFGDRFSI

*Nicotiana tabacum*

GSSIKNDGDPHPLADDEEDDDDLFGDRFSI

*Ipomoea nil*

GASIKSDG-PHPLADDDDEDDDLFEDRFSI

*Triphysaria pusilla*

GGSIKSDN-PHPLADDDDEDDDLFEDRFSI

*Catharanthus roseus*

GASIKPDG-PHPLADDDDEDDDLFEDRFGI

*Coffea canephora*

GASIKTDG-SHPLADDDDDDD--LFQDRFSI

*Antirrhinum majus*

GDSEKDDD-PHPLADDEDDDD--LFEDRFSI

*Lactuca saligna*

GASIGND---HPLADSDDD--LFEDRFSI

*Lactuca perennis*

GASIGND---HPLADSDDD--LFEDRFSI

*Lactuca serriola*

GASIGND---HPLADSDDD--LFEDRFSI

*Lactuca sativa*

GACIGND---HPLADSDDD--LFEDRFSI

*Centaurea maculosa*

GASIGND---HPLADSDDD--LFEDRFSI

*Centaurea solstitialis*

GASIGND---HPLADSDDD--LFEDRFSI

*Cichorium intybus*

AASIGND---HPLADSDDD--LFEDRFSI

*Carthamus tinctorius*

GASIGND---HPLADSDDD--LFEDRFSI

*Taraxacum kok-saghyz*

GASIGND---HPLADSDDD--LFEDRFSI

*Helianthus paradoxus*

GASIGSD---HPLADSDDD--LFGDRFSI

*Helianthus exilis*

GASIGSD---HPLADSDDD--LFEDRFSI

*Helianthus annuus*

GASIGSD---HPLADSDDD--LFEDRFSI

*Helianthus petiolaris*

GGSIGSDND--NPLAENSDD--LFEDRFSI

*Helianthus tuberosus*

GGSIGTDND--NPLAENSDD--LFEDRFSI
