# Supplementary material for: Comparative analysis of plant genomes allows the definition of the "Phytolongins": a novel non-SNARE longin domain protein family
Source: PubMed Central journal article supplement (PMC2779197; doi:10.1186/1471-2164-10-510), 2009-11-04

YKT6

PL

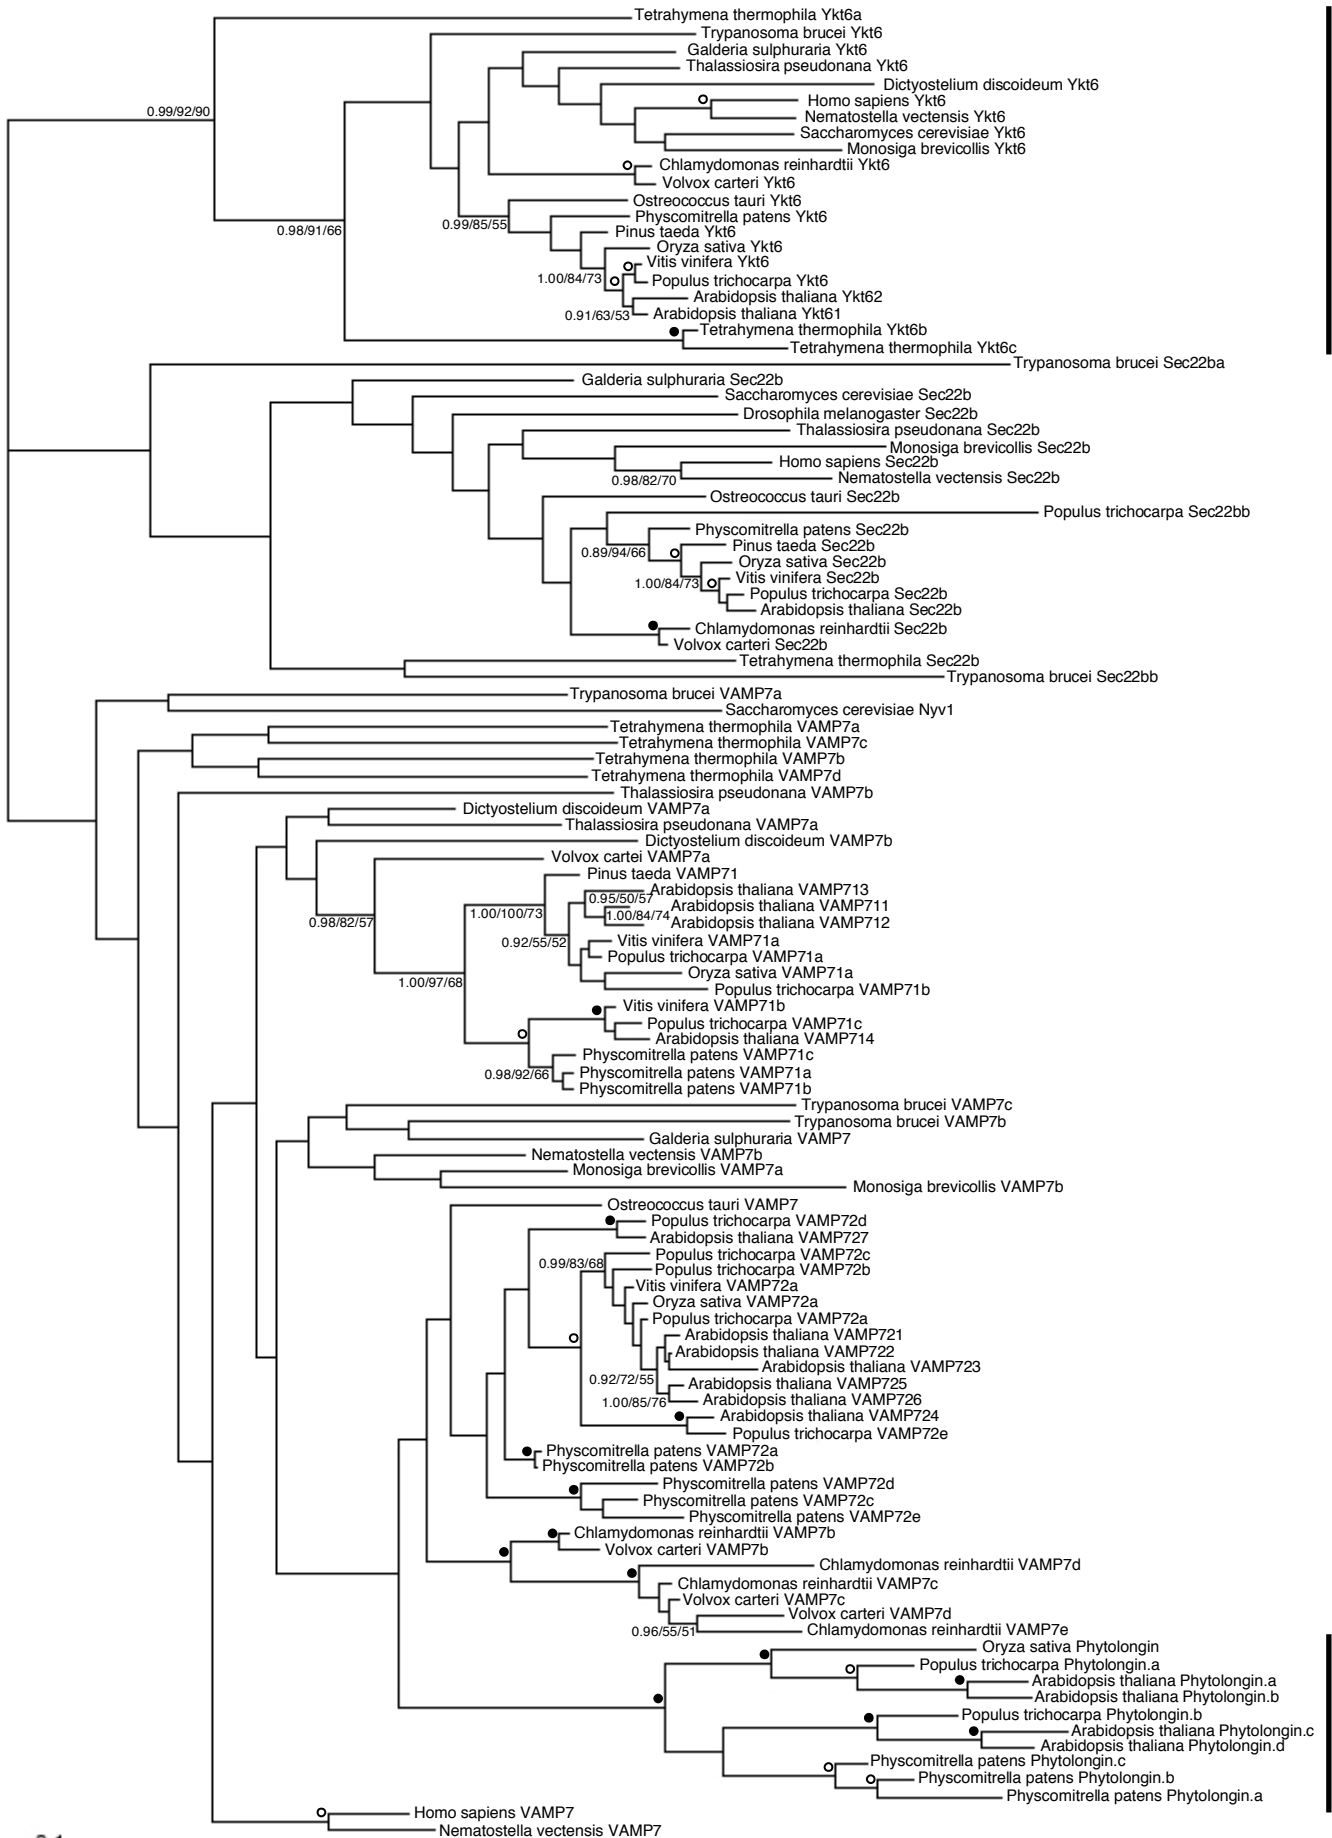

Supplement: 1471-2164-10-510-S4.pdf [file 1471-2164-10-510-S4.pdf]
